# Supplementary material for: Genome-Wide Identification of the KNOX Gene Family in Japanese Apricot (Prunus mume Sieb. et Zucc.) and Functional Characterization of PmKNAT2 Genes
Source: MDPI journal article supplement (doi:10.3390/genes14040939), 2023-04-18
Supplement: s1 [file s1]

**Table S1. Primer sequences used for qRT–PCR and PCR in Japanese apricot.**

| <b>Genes</b>        | <b>Sequences (5'-3')</b>   |                         |
|---------------------|----------------------------|-------------------------|
|                     | <b>Forward</b>             | <b>Reverse</b>          |
| <i>PmKNOX1</i>      | AACGGAGGGCATGGAATCAG       | TGGTTGCTTCATCGAACGGT    |
| <i>PmKNOX2</i>      | AAGCATGAGCTGAAGCAGGG       | GCGTTTGCTCTTCAAACTGT    |
| <i>PmKNOX3</i>      | ATCAAGAGGGCACCAACCAG       | AAGCCTCTCTTGAAGCCACC    |
| <i>PmKNOX4</i>      | AACTGTTTGACGGTGGGGTT       | CTCAAGTGGAGGTGTACGGG    |
| <i>PmKNOX5</i>      | ACTTCATCTGCTCACGCCTC       | CAAGGTGCCAATGTGACTGC    |
| <i>PmKNOX6</i>      | CAGCTGCCGCCTGTTATTTTC      | ATCCGCTGCTGCTACTCATC    |
| <i>PmKNOX7</i>      | CAGCTCCAAGCTCTCACAGT       | GGCCACTTGTAGTGTCTGCT    |
| <i>PmKNOX8</i>      | ATGTCAGAGTCCATGCCGTG       | ATCCCATCATGTCATGCCCG    |
| <i>PmKNOX9</i>      | TGACCTAGACCTGGAGGGAG       | GGTCAACAGACTGACCGGAA    |
| <i>PmKNOX10</i>     | AAGACGAACTGGAGTGCGAG       | ACATCCCCATTGGCTCGAAG    |
| <i>PmKNOX11</i>     | TGGGAGAAGAGGTTTCGTGC       | AAGCATCGAGCTCAGGATCG    |
| <i>PmRP2</i>        | TGAAGCATACACCTATGATGATGAAG | CTTTGACAGCACCAGTAGATTCC |
| <i>PmKNAT2a-CDS</i> | ATGATGGAGGAACTGTACGGC      | TCAGTCCTTGGTAAAACAAGG   |
| <i>PmKNAT2b-CDS</i> | ATGGAGGAAATGTACGGATTGC     | TCAGTCATCTGTGAAAAATGG   |

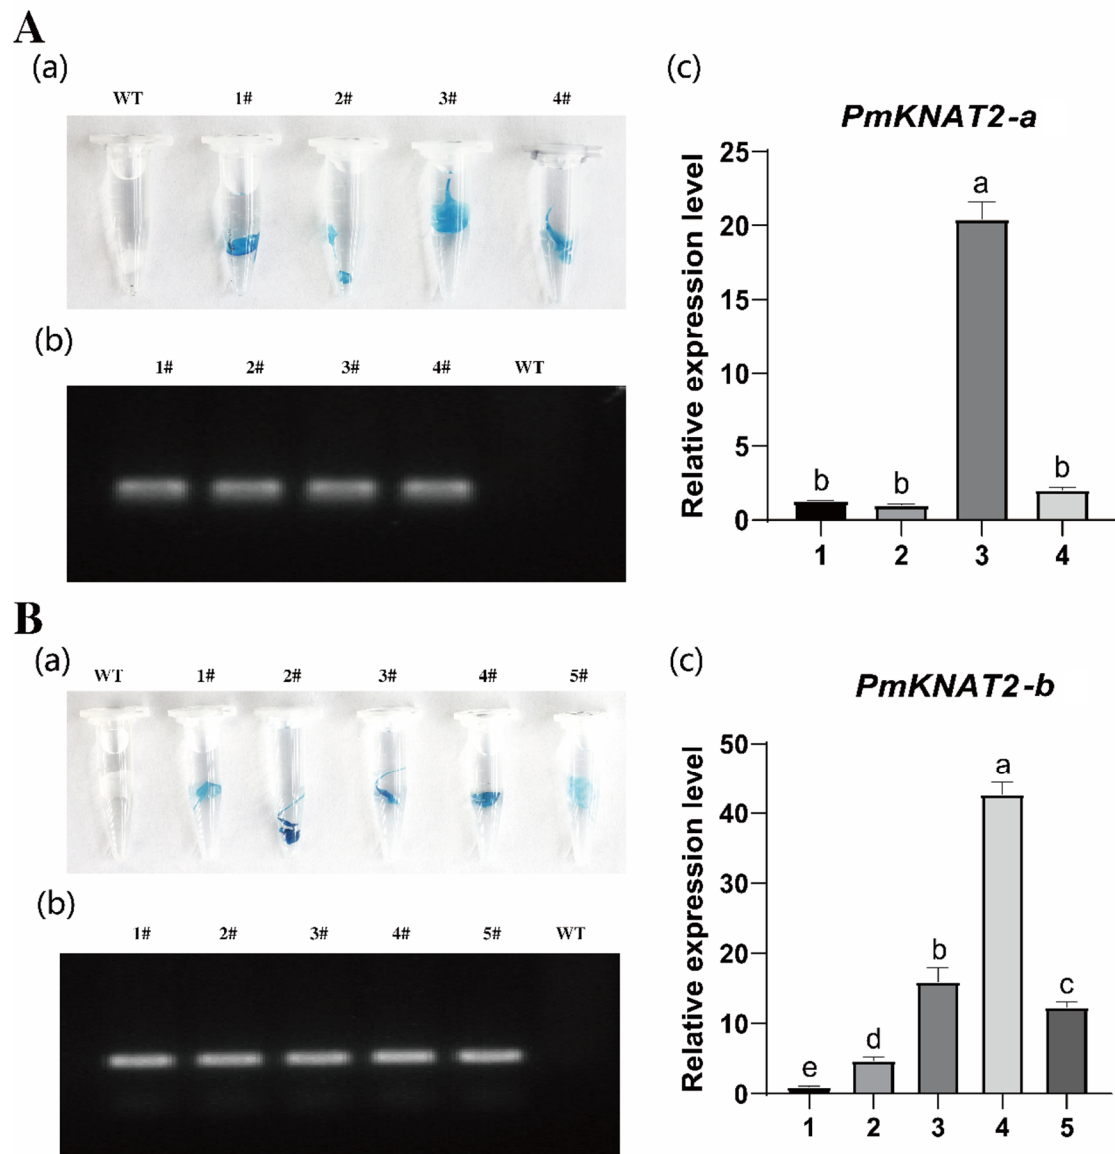

**Figure S1. Molecular identification of heterologous expression of *PmKNAT2-a* and *KNAT2-b* in *Arabidopsis*.** (A) GUS staining (a), detection of target gene insertion into the genome(b) and expression of *PmKNAT2-a* in transgenic lines (c). B. GUS staining (a), detection of target gene insertion into the genome(b) and expression of *PmKNAT2-b* in transgenic lines (c).
